# Supplementary material for: Potential Antagonistic Bacteria against Verticillium dahliae Isolated from Artificially Infested Nursery
Source: MDPI journal article supplement (doi:10.3390/cells10123588), 2021-12-20
Supplement: s1 [file s1]

## Supplementary Materials

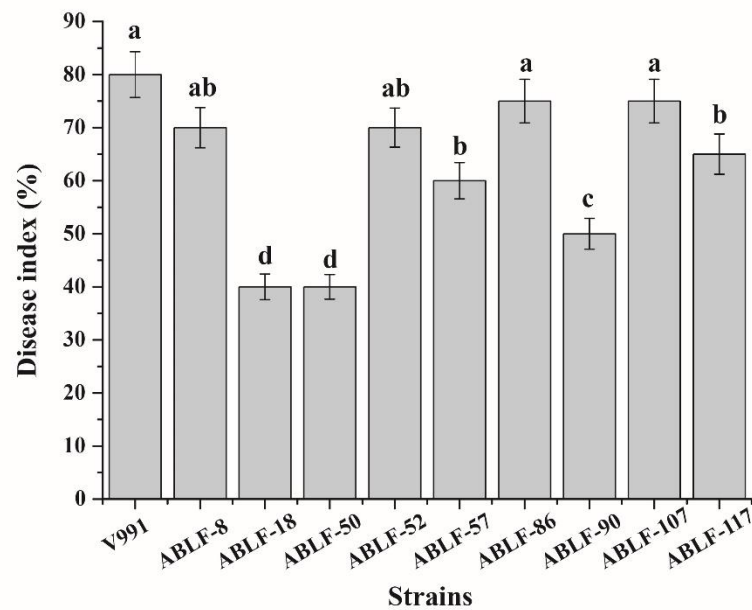

Figure S1. Biocontrol assessment of antagonistic bacterial strains against *V. dahliae* strain V991. Cotton seedlings in pots were inoculated with a candidate bacterial strain. After 24 h, root were dipped in a conidial suspension of *V. dahliae*. At 14 dpi, symptoms were recorded and the disease index was calculated based on the means for three independent experiments. Different letters above bars for a carbon source indicate a significant difference among strains ( $P < 0.05$ ).
